# Supplementary material
Source: PubMed Central journal article supplement (PMC11110881)
Supplement: NIHMS1986727-supplement-Supplementary_Materials.pdf [file NIHMS1986727-supplement-Supplementary_Materials.pdf]

## **Supplementary Figures**

### **Engineering a sprayable and elastic hydrogel adhesive with antimicrobial properties for wound healing**

*Nasim Annabi\**, *Devyesh Rana*<sup>1</sup>, *Ehsan Shirzaei Sani*<sup>1</sup>, *Roberto Portillo-Lara*, *Jessie L. Gifford*, *Mohammad M. Fares*, *Suzanne M. Mithieux*, *Anthony S. Weiss*,

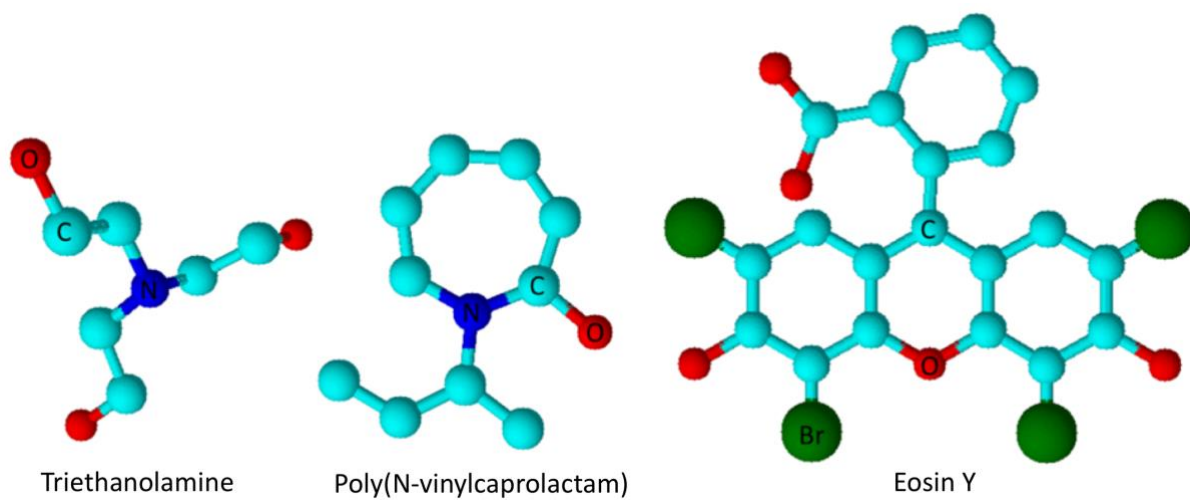

**Figure S1. Schematic of triethanolamine (TEA), poly(N-vinylcaprolactam) (VC), and Eosin Y.**

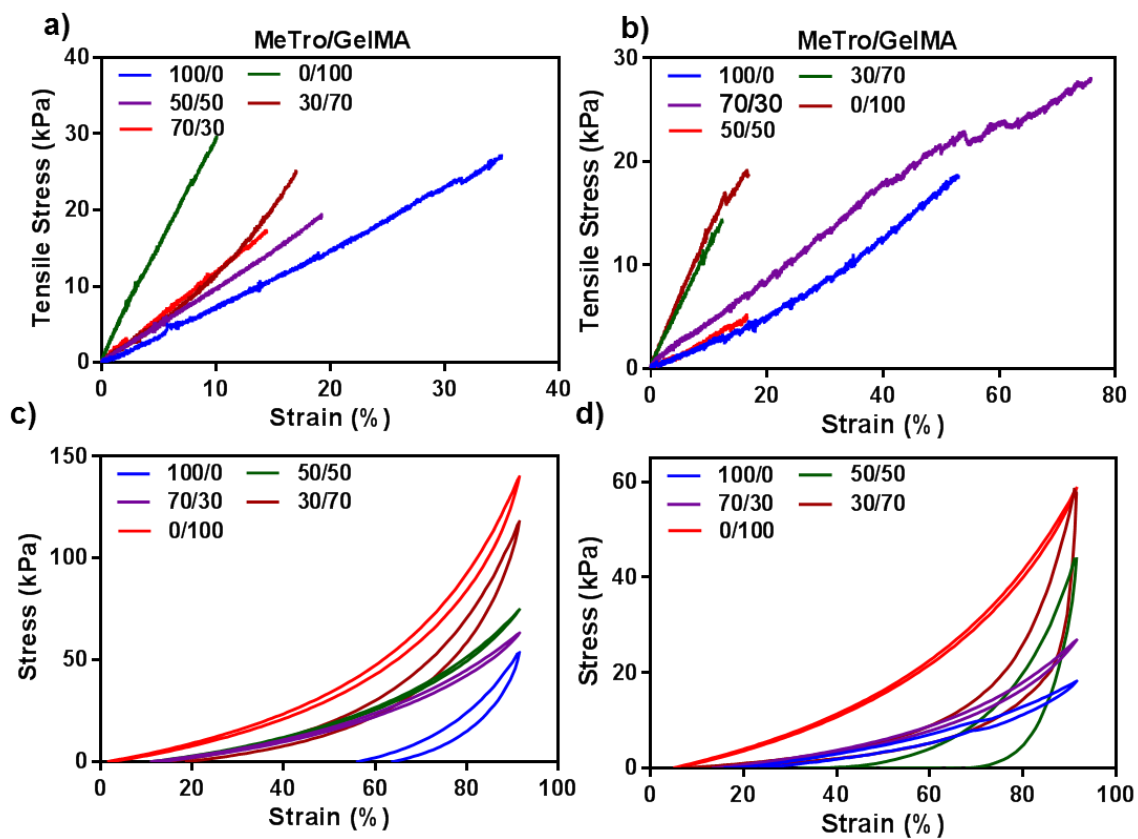

**Figure S2. Mechanical characterization of MeTro/GelMA composite hydrogels.**

Representative tensile stress-strain curves of composite hydrogels produced by using (a) 20% (w/v) and (b) 15% (w/v) total polymer concentration and varying ratios of MeTro/GelMA.

Representative compressive stress-strain curves of composite hydrogels produced by (c) 20% (w/v) and (d) 15% (w/v) total polymer concentration and varying ratios of MeTro/GelMA.

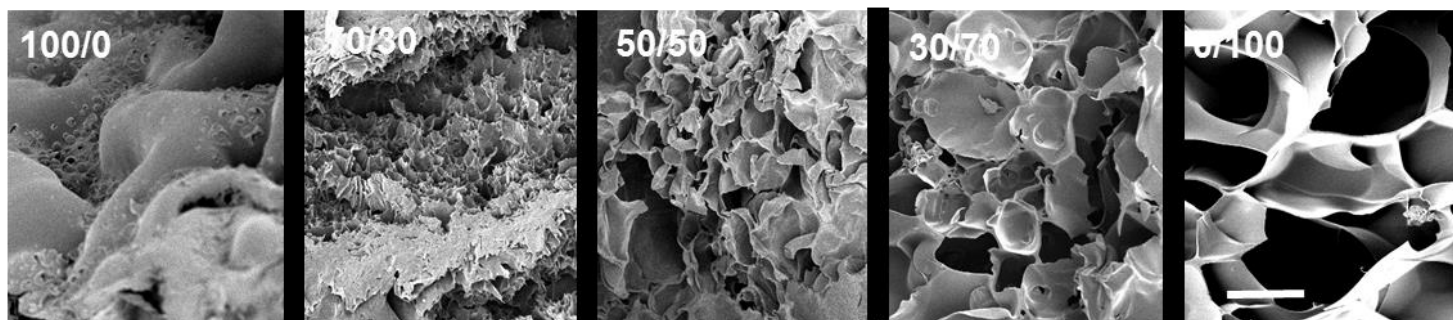

**Figure S3. Pore characterization of the MeTro/GelMA composite hydrogels.**

Representative SEM images from cross-sections of composite hydrogels produced at 20% (w/v) total polymer concentration and varying ratios of MeTro/GelMA.

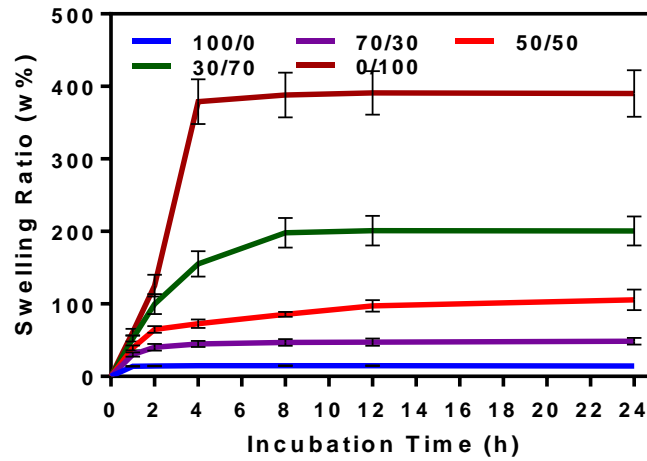

**Figure S4. *In vitro* swelling ratio of MeTro/GelMA composite hydrogels produced at 20% (w/v) final polymer concentration.** The graph shows the different swelling ratios of composite hydrogels produced at 20% (w/v) final polymer concentration, and varying MeTro/GelMA ratios. Data are represented as mean  $\pm$  SD (\* $p$ <0.05, \*\* $p$ <0.01, \*\*\* $p$ <0.001, \*\*\*\* $p$ <0.0001 and  $n \geq 5$ ).

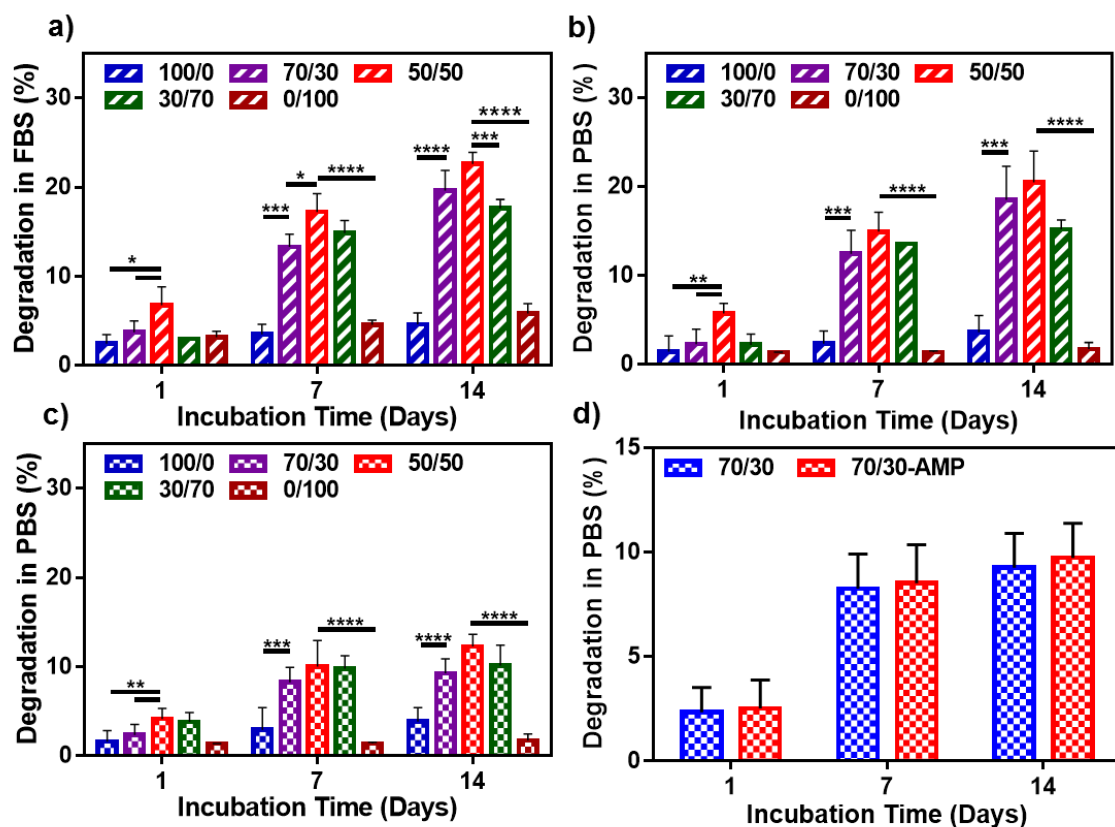

**Figure S5. *In vitro* degradation properties of MeTro/GelMA composite hydrogels produced by using 15% and 20% (w/v) final polymer concentration. *In vitro* degradation properties of composite hydrogels at varying ratios of MeTro/GelMA and 20% (w/v) final polymer concentration in (a) FBS solution (DPBS+10%FBS), (b) in DPBS at 37°C. (c) *In vitro* degradation properties of 15% (w/v) composite hydrogels at varying ratios of MeTro/GelMA in DPBS. (d) *In vitro* degradation of 70/30 MeTro/GelMA hydrogels with and without AMP in DPBS at 37 °C. Data is represented as mean  $\pm$  SD (\*p<0.05, \*\*p<0.01, \*\*\*p<0.001, \*\*\*\*p<0.0001 and n  $\geq$  4).**

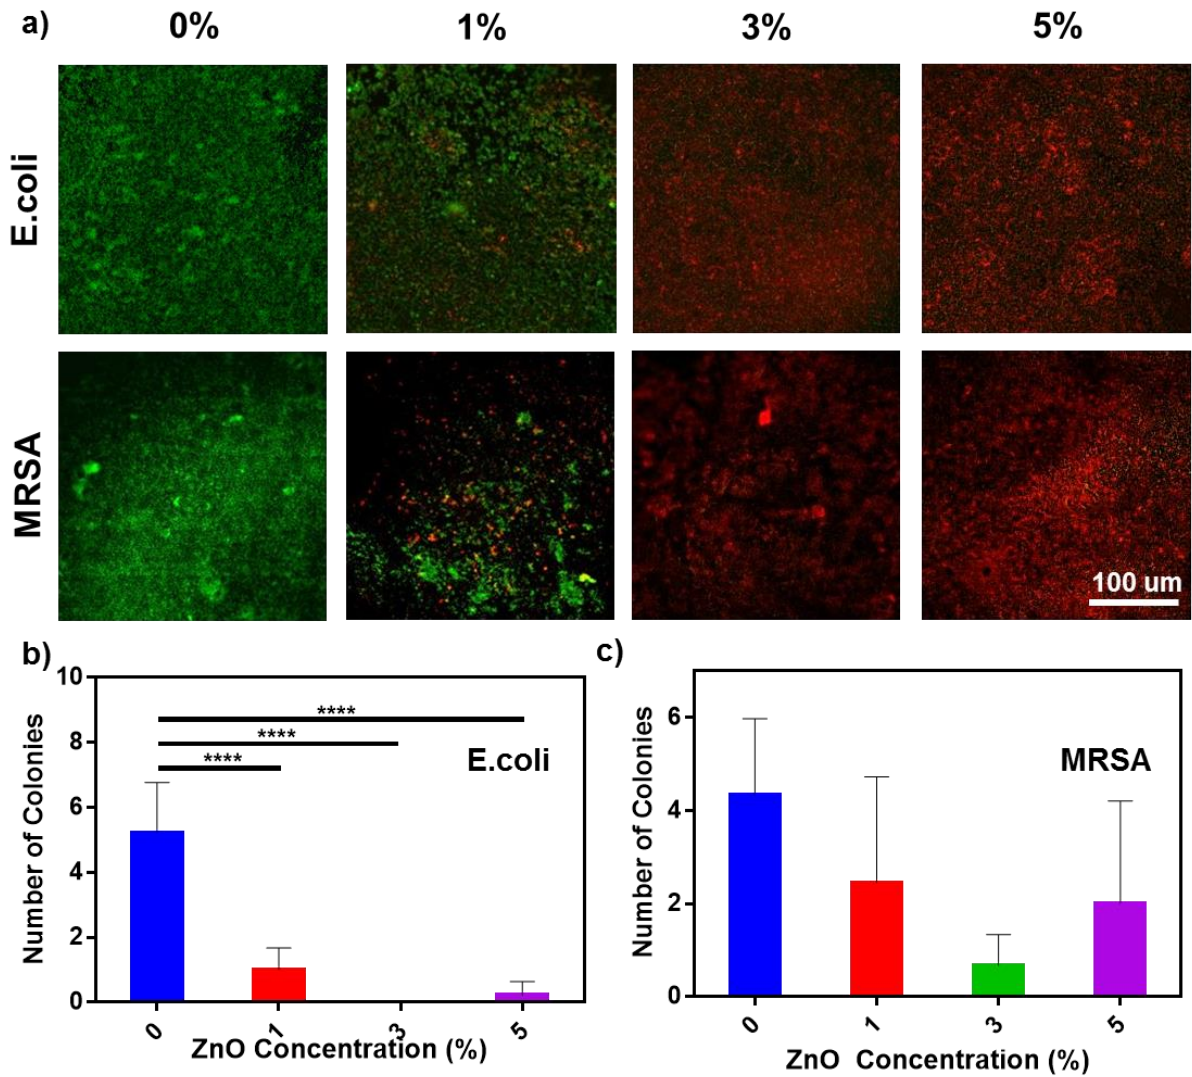

**Figure S6. *In vitro* antibacterial properties of Metro/GelMA-ZnO and MeTro/GelMA (control) hydrogels.** (a) Representative live/dead images from MRSA and *E. coli* seeded on MeTro/GelMA-ZnO hydrogels at different ZnO concentrations (0% as a control, 1%, 3% and 5% (w/v)). Colony forming units assay for MeTro/GelMA-ZnO hydrogels with different ZnO concentrations (0% as a control, 1%, 3% and 5% (w/v)) seeded with (b) *E. coli* and (c) MRSA. 70/30 MeTro/GelMA hydrogels with 15% (w/v) total polymer concentration were used for these studies. Data is represented as mean  $\pm$  SD (\* $p$ <0.05, \*\* $p$ <0.01, \*\*\* $p$ <0.001, \*\*\*\* $p$ <0.0001,  $n \geq 3$ ).



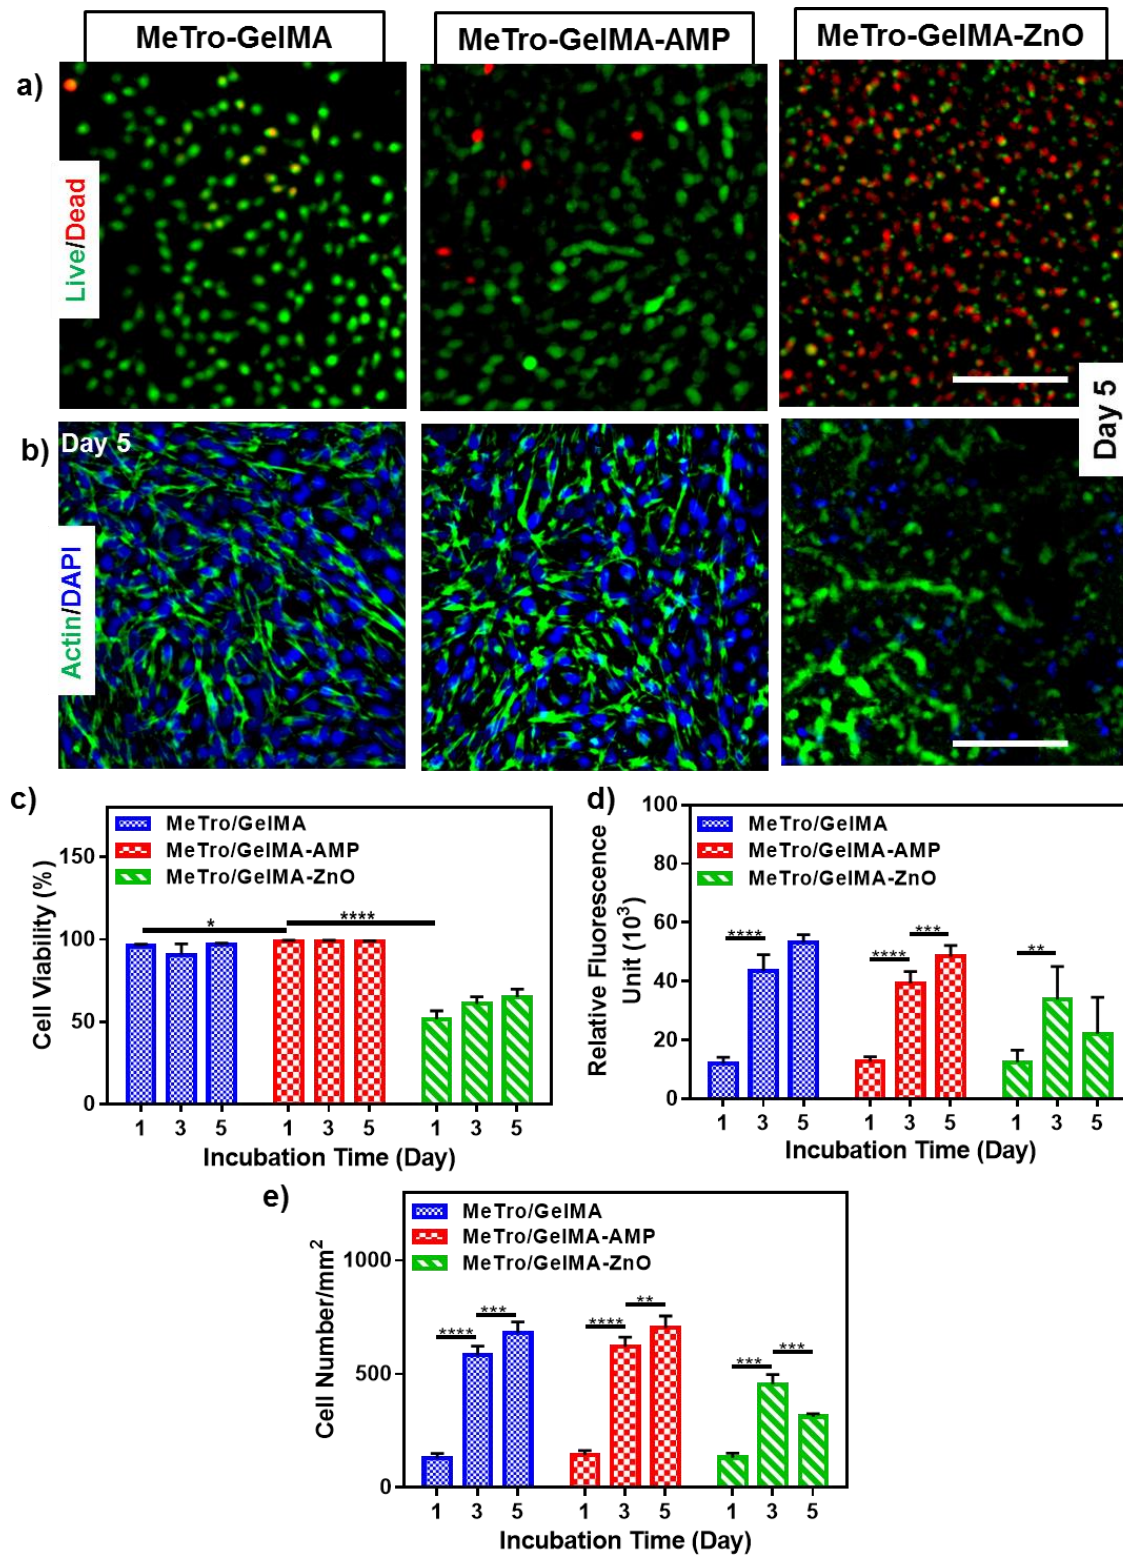

**Figure S7.** *In vitro* 2D cell seeding on MeTro/GelMA and MeTro/GelMA-AMP (0.1% (w/v) AMP) and MeTro/GelMA-ZnO (3% (w/v) ZnO) using 3T3 cells. Representative (a) live/dead and (b) Actin/DAPI stained images for 3T3 cells seeded on the surface of



MeTro/GelMA, MeTro/GelMA-AMP and MeTro/GelMA-ZnO hydrogels on day 5 post seeding (scale bar = 200  $\mu\text{m}$ ). **(c)** Quantification of cell viability seeded on MeTro/GelMA, MeTro/GelMA-AMP and MeTro/GelMA-ZnO scaffolds after 1, 3, and 5 days of seeding. **(d)** Quantification of metabolic activity of 3T3 cells seeded on the surface of MeTro/GelMA, MeTro/GelMA-AMP and MeTro/GelMA-ZnO hydrogels after 1, 3, and 5 days. **(e)** Quantification of 3T3 cell number per area, seeded on the surface of MeTro/GelMA, MeTro/GelMA-AMP and MeTro/GelMA-ZnO hydrogels after 1, 3, and 5 days seeding. 30/70 MeTro/GelMA hydrogels with 15% (w/v) total polymer concentration were use for 2D cell seeding. Data is represented as mean  $\pm$  SD (\* $p < 0.05$ , \*\* $p < 0.01$ , \*\*\* $p < 0.001$  and \*\*\*\* $p < 0.0001$ ,  $n \geq 3$ ).
